# Supplementary material for: GABA-Positive Astrogliosis in Sleep-Promoting Areas Associated with Sleep Disturbance in 5XFAD Mice
Source: MDPI journal article supplement (doi:10.3390/ijms24119695), 2023-06-02
Supplement: s1 [file s1]

# Supplementary materials

Victor James Drew, Mincheol Park, Tae Kim

Table S1. Immunohistochemistry antibody list

| Antibody                                      | Species    | Catalog #   | Company                                                   | Dilution |
|-----------------------------------------------|------------|-------------|-----------------------------------------------------------|----------|
| <i>Primary</i>                                |            |             |                                                           |          |
| Anti-nNOS antibody                            | Mouse      | Sc-5302     | Santa Cruz Biotechnology, Dallas, TX                      | 1:500    |
| Anti-Choline acetyltransferase antibody       | Goat       | AB144P      | Merck, Darmstadt, Germany                                 | 1:500    |
| Anti-Galanin antibody                         | Goat       | NBP1-45217  | Novus Biologicals, Centennial, CO                         | 1:500    |
| Anti-GABA antibody                            | Guinea pig | AB175       | Merck, Darmstadt, Germany                                 | 1:200    |
| Anti-GFAP antibody                            | Rabbit     | Z033429     | Aligent, Santa Clara, CA                                  | 1:500    |
| Anti-GABRD antibody                           | Rabbit     | PA5-101598  | Thermo Fisher Scientific, Waltham, MA                     | 1:500    |
| <i>Secondary</i>                              |            |             |                                                           |          |
| AlexaFlour-488 (anti-goat) IgG antibody       | Donkey     | A-11055     | Thermo Fisher Scientific, Waltham, MA                     | 1:500    |
| AlexaFlour-488 (anti-mouse) IgG antibody      | Donkey     | A21202      | Thermo Fisher Scientific, Waltham, MA                     | 1:500    |
| AlexaFlour-555 (anti-rabbit) IgG antibody     | Donkey     | A31572      | Thermo Fisher Scientific, Waltham, MA                     | 1:500    |
| AlexaFlour-647 (anti-guinea pig) IgG antibody | Donkey     | 703-545-155 | Jackson ImmunoResearch Laboratories, Inc., West Grove, PA | 1:500    |

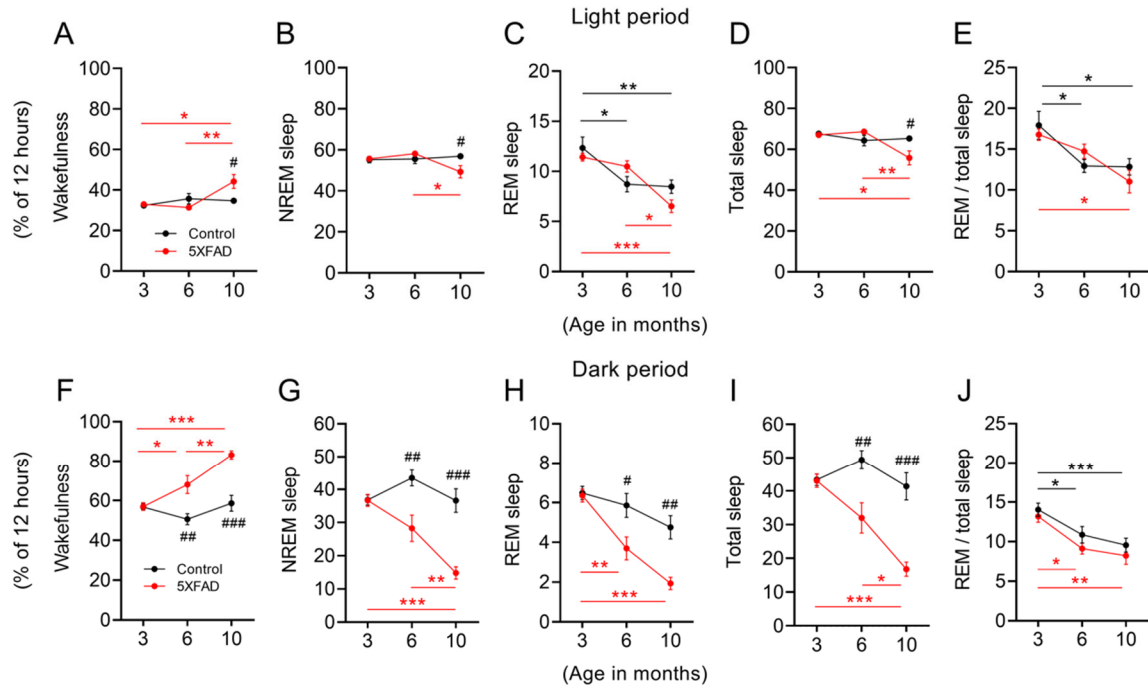

**Figure S1.** 5XFAD mice exhibit diminished NREM and REM sleep duration with age. (A–E) Total recording time during light period spent in wakefulness, NREM, REM, total sleep and REM/total sleep for control and 5XFAD mice of 3, 6 and 10 months of age. (F–J) Total recording time during dark period spent in wakefulness, NREM, REM, total sleep and REM/total sleep for control and 5XFAD mice of 3, 6 and 10 months of age. Data were presented as mean  $\pm$  SEM (n = 10 - 12 mice per group). \* $p$  < 0.05, \*\* $p$  < 0.01, and \*\*\* $p$  < 0.001 in red (5XFAD) and black (control) by ANOVA or Kruskal-Wallis among age groups. # $p$  < 0.05, ## $p$  < 0.01, ### $p$  < 0.001 by independent t-test or Mann-Whitney u test between genotypes. *Abbreviations:* ANOVA, analysis of variance; EEG, electroencephalogram; NREM, non-rapid eye movement; REM, rapid eye movement

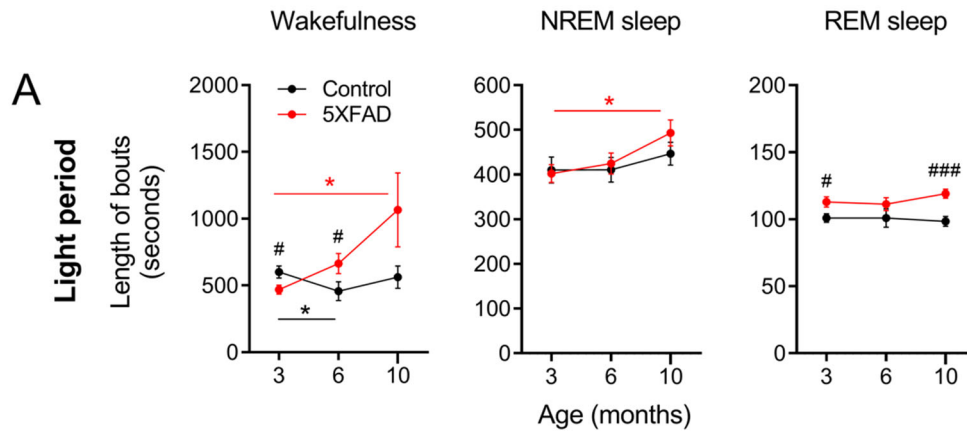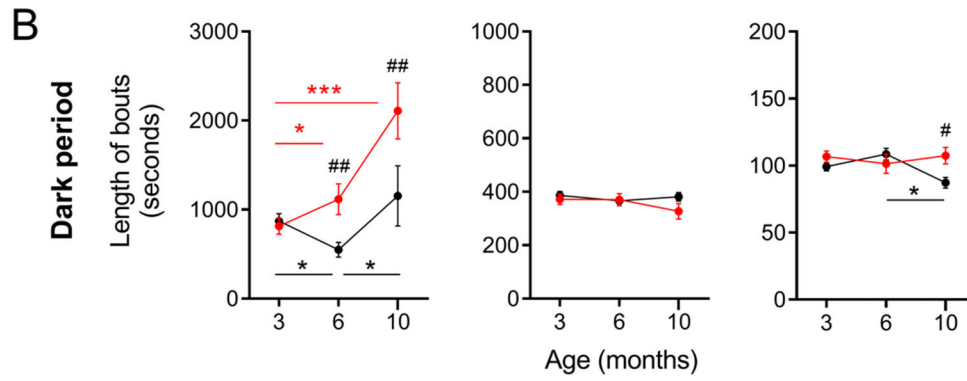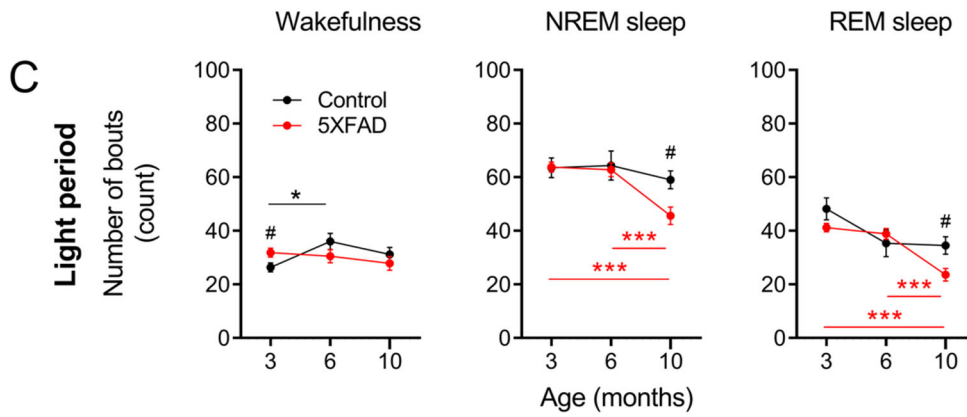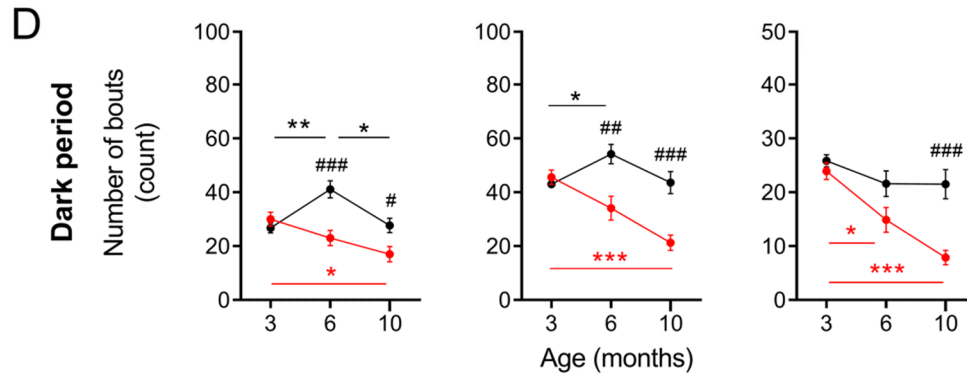

**Figure S2.** 5XFAD mice exhibit altered sleep bout characteristics with age. **(A)** Bout lengths during light period for wakefulness, NREM, and REM sleep for control and 5XFAD mice of 3, 6 and 10 months of age. **(B)** Bout lengths during dark period for wakefulness, NREM, and REM sleep for control and 5XFAD mice of 3, 6 and 10 months of age. **(C)** Bout counts during light period for wakefulness, NREM, and REM sleep for control and 5XFAD mice of 3, 6 and 10 months of age. **(D)** Bout counts during dark period for wakefulness, NREM, and REM sleep for control and 5XFAD mice of 3, 6 and 10 months of age. Data were presented as mean  $\pm$  SEM (n = 10 - 12 mice per group). \* $p$  < 0.05, \*\* $p$  < 0.01, and \*\*\* $p$  < 0.001 in red (5XFAD) and black (control) by ANOVA or Kruskal-Wallis among age groups. # $p$  < 0.05, ## $p$  < 0.01, ### $p$  < 0.001 by independent t-test or Mann-Whitney u test between genotypes. *Abbreviations:* ANOVA, analysis of variance; EEG, electroencephalogram; NREM, non-rapid eye movement; REM, rapid eye movement

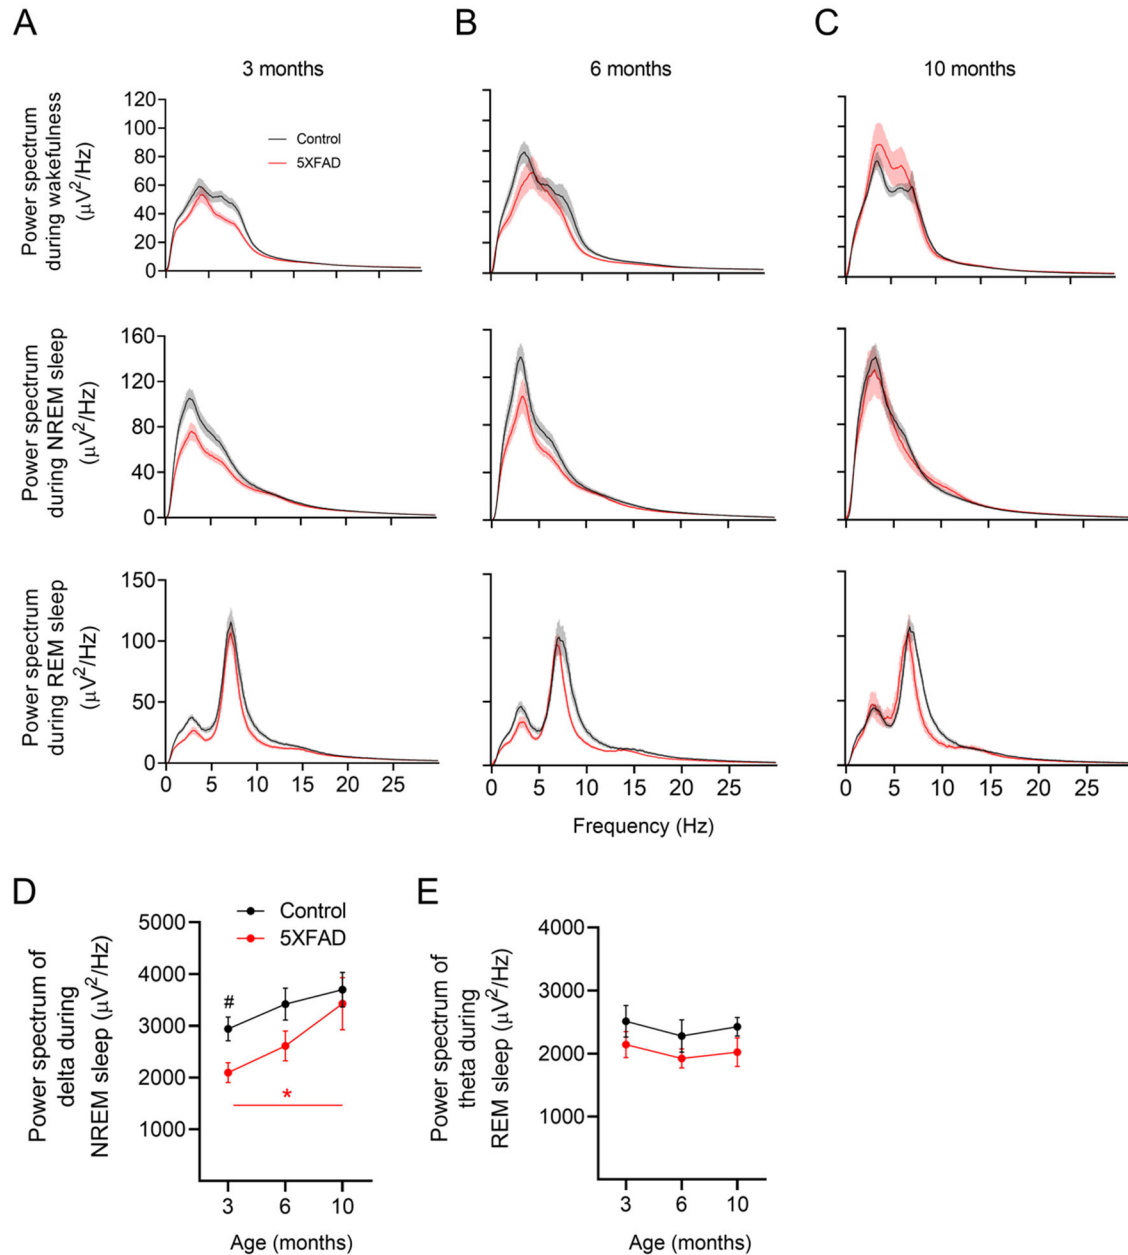

**Figure S3.** 5XFAD mice exhibit increased NREM delta power with age. **(A–C)** Full power spectra of 24-hour EEG recording session for wakefulness, NREM and REM sleep for control and 5XFAD mice of 3, 6 and 10 months of age, respectively. **(D)** Delta power during NREM sleep of control and 5XFAD mice at all age groups. **(E)** Theta power during REM sleep of control and 5XFAD mice at all age groups. Data were presented as mean  $\pm$  SEM ( $n = 10 - 12$  mice per group).  $*p < 0.05$ , in red (5XFAD) and black

(control) by ANOVA or Kruskal-Wallis among age groups (panels D and E).  $^{\#}p < 0.05$ , by independent t-test or Mann-Whitney u test between genotypes (panels D and E). *Abbreviations*: ANOVA, analysis of variance; EEG, electroencephalogram; NREM, non-rapid eye movement; REM, rapid eye movement

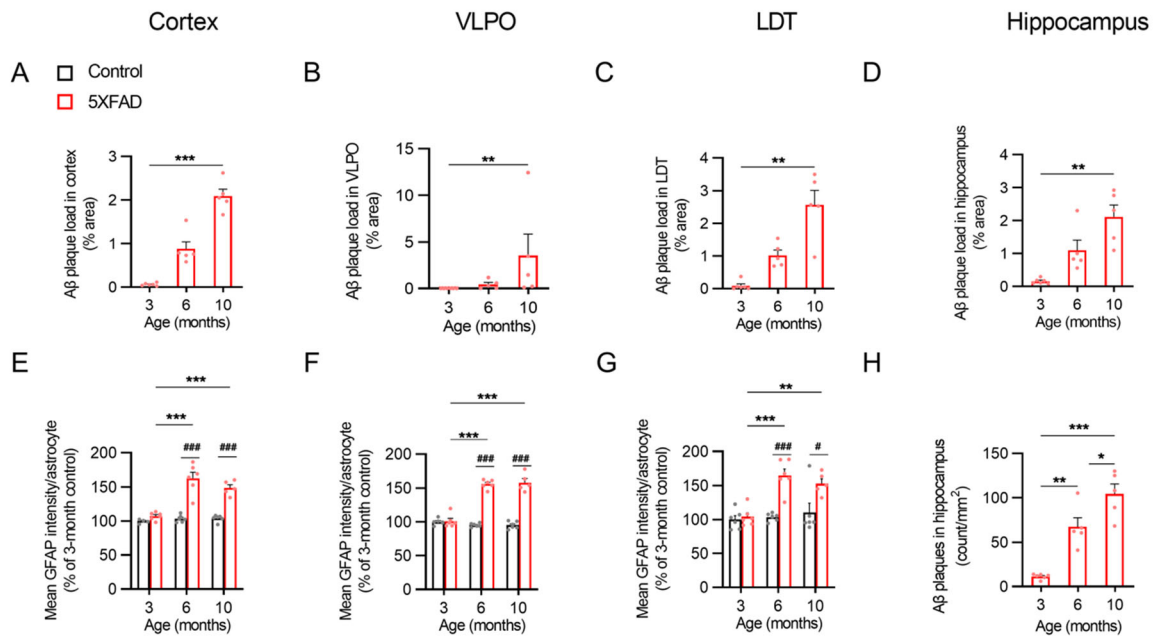

**Figure S4.** Regional increases in Aβ and astrocytosis in 5XFAD mice. (A) Aβ plaque load in the cortex of 5XFAD mice. (B) Aβ plaque load in the VLPO of 5XFAD mice. (C) Aβ plaque load in the LDT of 5XFAD mice. (D) Aβ plaque load in the hippocampus of 5XFAD mice. (E) The GFAP intensity observed in the cortex. (F) The GFAP intensity observed in the VLPO. (G) The GFAP intensity observed in the LDT. (H) The number of Aβ plaques per area unit of the hippocampus. Black and red bars indicated the mean value and raw data in control and 5XFAD mice, respectively. Each dot represents the raw data.

Data were presented as mean ± SEM (n = 5-6 mice per group). \* $p < 0.05$ , \*\* $p < 0.01$ , \*\*\* $p < 0.001$

between ages, # $p < 0.05$ , ### $p < 0.001$  between genotypes by one-way ANOVA with Kruskal-Wallis post hoc test (panels A–D), and two-way ANOVA test with Tukey post hoc test (panels E–G),.

*Abbreviations:* ANOVA, analysis of variance; EEG, electroencephalogram; GABA, gamma aminobutyric acid; GFAP, glial fibrillary acidic protein; HIP, hippocampus; LDT, laterodorsal tegmentum; nNOS, neuronal nitric oxide synthase; NREM, non-rapid eye movement; REM, rapid eye movement; VLPO, ventrolateral preoptic area

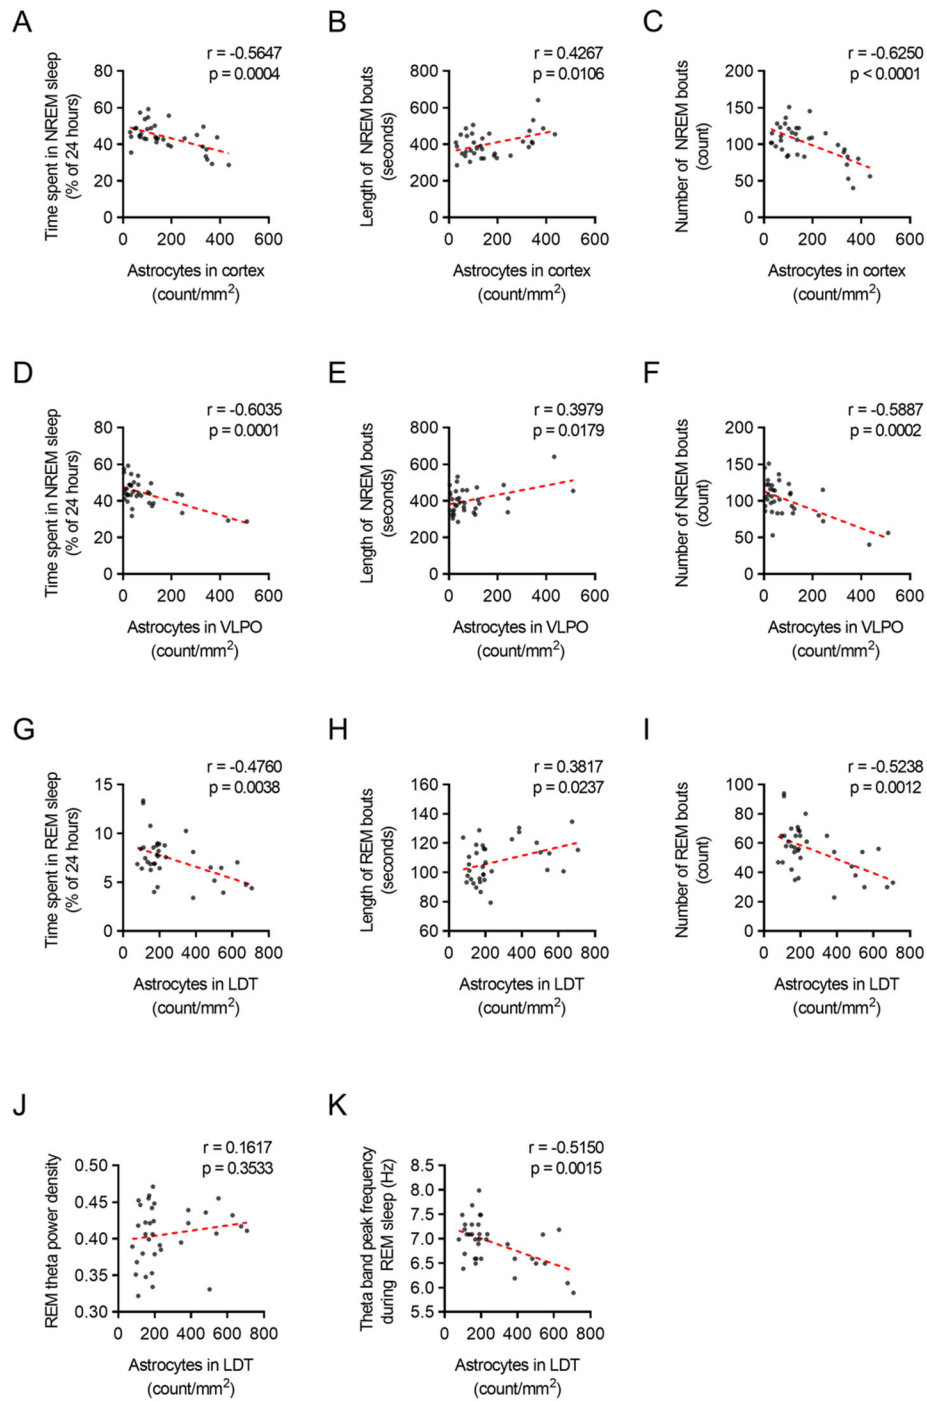

**Figure S5.** Sleep disturbance correlates with elevated astrocyte counts. **(A)** The correlation between the ratio of number of astrocytes in the cortex and NREM recording time (%). **(B)** The correlation between the ratio of number of astrocytes in the cortex and NREM bout length (%). **(C)** The correlation between



the ratio of number of astrocytes in the cortex and NREM bout count (%). **(D)** The correlation between the ratio of number of astrocytes in the VLPO and NREM recording time (%). **(E)** The correlation between the ratio of number of astrocytes in the VLPO and NREM bout length (%). **(F)** The correlation between the ratio of number of astrocytes in the VLPO and NREM bout count (%). **(G)** The correlation between the ratio of number of astrocytes in the LDT and REM recording time (%). **(H)** The correlation between the ratio of number of astrocytes in the LDT and REM bout length (%). **(I)** The correlation between the ratio of number of astrocytes in the LDT and REM bout count (%). **(J)** The correlation between the ratio of number of astrocytes in the LDT and REM theta peak frequency (Hz). Black and red bars indicated the mean value and raw data in control and 5XFAD mice, respectively. Each dot represents the raw data. n = 5-6 mice per group). Each dot represents the raw data. Data were presented as mean  $\pm$  SEM (n = 5-6 mice per group) by Pearson correlation test (panels **A-K**). *Abbreviations:* ANOVA, analysis of variance; EEG, electroencephalogram; GABA, gamma aminobutyric acid; GFAP, glial fibrillary acidic protein; HIP, hippocampus; LDT, laterodorsal tegmentum; nNOS, neuronal nitric oxide synthase; NREM, non-rapid eye movement; REM, rapid eye movement; VLPO, ventrolateral preoptic area

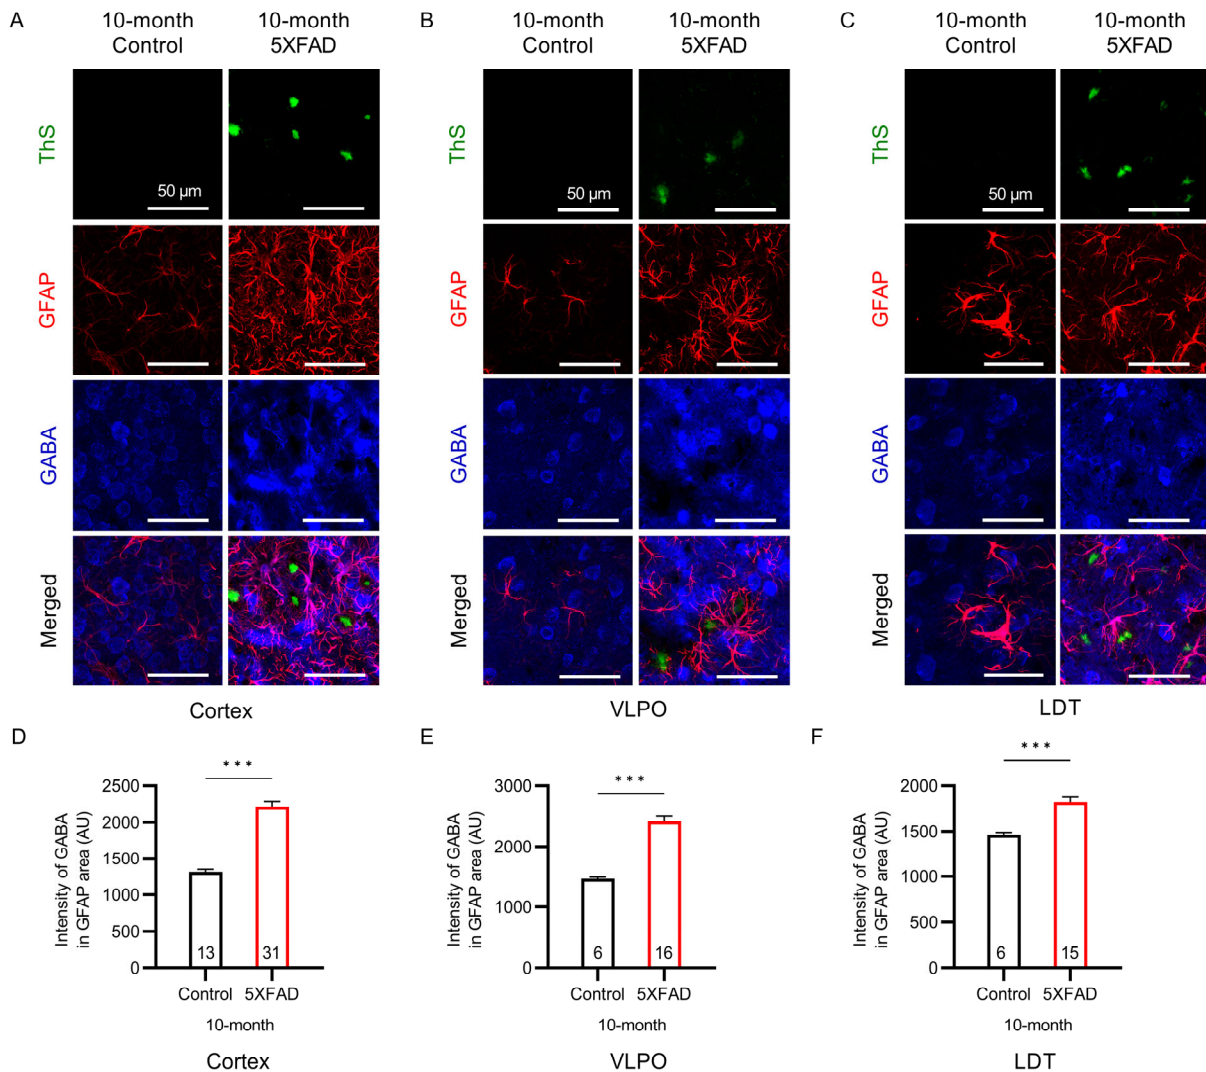

**Figure S6.** Enhanced magnification histology images and GABA intensity in GFAP area.

Representative images of GABA-positive reactive astrocytes near the A $\beta$  plaques in the cortex (A), VLPO (B) and LDT (C) of 10-month-old control and 5XFAD mice. Scale bar indicates 50  $\mu$ m. Mean intensity of GABA in GFAP-positive areas in the cortex (D), VLPO (E) and LDT (F) based on representative images. Control and 5XFAD mice represented by black and red bars, respectively. Numbers at the base of each bar represent the number of astrocytes in representative images corresponding to respective brain region. Data were presented as mean  $\pm$  SEM. Representative images were obtained using a single control and 5XFAD mouse. \*\*\* $p$  <

0.001 by independent t-test (panels D–F). Abbreviations: GABA, gamma aminobutyric acid; GFAP, glial fibrillary acidic protein; LDT, laterodorsal tegmentum; VLPO, ventrolateral preoptic area.
